# Supplementary material for: TGFβ-Associated Signature Predicts Prognosis and Tumor Microenvironment Infiltration Characterization in Gastric Carcinoma
Source: Front Genet. 2022 May 18;13:818378. doi: 10.3389/fgene.2022.818378 (PMC9157556; doi:10.3389/fgene.2022.818378)
Supplement: Supplementary file 2 [file Table14.XLSX]

## Sheet: T cell–inflamed gene
The correlations between T cell inflamed gene expression and the risk score
risk.score	T cell–inflamed gene	r	p.value	relation
risk.score	CCL5	0.145649	0.00633995	1.Positive Relation
risk.score	CD27	0.10945	0.0407128	1.Positive Relation
risk.score	CD274	0.134128	0.0120157	1.Positive Relation
risk.score	CD276	0.410194	1.33227e-15	1.Positive Relation
risk.score	CD8A	0.133653	0.0123243	1.Positive Relation
risk.score	CMKLR1	0.338112	8.29496e-11	1.Positive Relation
risk.score	CXCL9	0.108519	0.042464	1.Positive Relation
risk.score	CXCR6	0.0550688	0.304262	1.Positive Relation
risk.score	HLA-DQA1	0.243359	4.10531e-06	1.Positive Relation
risk.score	HLA-DRB1	0.123693	0.0206292	1.Positive Relation
risk.score	HLA-E	0.116368	0.0295058	1.Positive Relation
risk.score	IDO1	0.0586258	0.27404	1.Positive Relation
risk.score	LAG3	0.111962	0.0362862	1.Positive Relation
risk.score	NKG7	0.168478	0.00155992	1.Positive Relation
risk.score	PDCD1LG2	0.409292	1.33227e-15	1.Positive Relation
risk.score	PSMB10	-0.0376366	0.482775	2.Negative Relation
risk.score	STAT1	0.0438067	0.413923	1.Positive Relation
risk.score	TIGIT	0.0927142	0.0832643	1.Positive Relation
